# Supplementary material for: Therapeutic potential of combined BRAF/MEK blockade in BRAF-wild type preclinical tumor models
Source: Springer Nature journal article supplement (doi:10.1186/s13046-018-0820-5), 2018-07-09

**Title: Therapeutic potential of combined BRAF/MEK blockade in *BRAF*-wild type preclinical tumor models.**

*Anais del Curatolo*<sup>1,2§</sup>, *Fabiana Conciatori*<sup>1,3§</sup>, *Ursula Cesta Incani*<sup>1</sup>, *Chiara Bazzichetto*<sup>1,3</sup>, *Italia Falcone*<sup>1</sup>, *Vincenzo Corbo*<sup>2</sup>, *Sabrina D'Agosto*<sup>2</sup>, *Adriana Eramo*<sup>4</sup>, *Giovanni Sette*<sup>4</sup>, *Isabella Sperduti*<sup>5</sup>, *Teresa De Luca*<sup>6</sup>, *Mirko Marabese*<sup>7</sup>, *Senji Shirasawa*<sup>8</sup>, *Ruggero De Maria*<sup>9</sup>, *Aldo Scarpa*<sup>2</sup>, *Massimo Broggin*<sup>7</sup>, *Donatella Del Bufalo*<sup>6</sup>, *Francesco Cognetti*<sup>1</sup>, *Michele Milella*<sup>1§\*</sup> and *Ludovica Ciuffreda*<sup>1§</sup>.

(\*E-mail: [michele.milella@ifogov.it](mailto:michele.milella@ifogov.it); [michelemilella@hotmail.com](mailto:michelemilella@hotmail.com))

<sup>1</sup> Medical Oncology 1, IRCCS Regina Elena National Cancer Institute, Rome, Italy; [anais1@hotmail.it](mailto:anais1@hotmail.it) (A.D.C.); [fabiana.conciatori@ifogov.it](mailto:fabiana.conciatori@ifogov.it) (F.C.); [ursulacestaincani@virgilio.it](mailto:ursulacestaincani@virgilio.it) (U.C.I.); [chiara.bazzichetto@ifogov.it](mailto:chiara.bazzichetto@ifogov.it) (C.B.); [italia.falcone@ifogov.it](mailto:italia.falcone@ifogov.it) (I.F.); [francesco.cognetti@ifogov.it](mailto:francesco.cognetti@ifogov.it) (F.C.); [michele.milella@ifogov.it](mailto:michele.milella@ifogov.it) (M.M.); [ludovica.ciuffreda@ifogov.it](mailto:ludovica.ciuffreda@ifogov.it) (L.C.);

<sup>2</sup> ARC-Net Research Centre and Department of Pathology, University of Verona, Verona, Italy; [vincenzocorbo@gmail.com](mailto:vincenzocorbo@gmail.com) (V.C.); [sabrinaluigia.dagosto@univr.it](mailto:sabrinaluigia.dagosto@univr.it) (S.D.A.); [aldo.scarpa@univr.it](mailto:aldo.scarpa@univr.it) (A.S.);

<sup>3</sup> University of Rome "La Sapienza", Rome, Italy;

<sup>4</sup> Department of Hematology, Oncology and Molecular Medicine, Istituto Superiore di Sanità, Rome, Italy; [adriana.eramo@iss.it](mailto:adriana.eramo@iss.it) (A.E.); [giovanni.sette@gmail.com](mailto:giovanni.sette@gmail.com) (G.S.);

<sup>5</sup> Biostatistics, IRCCS Regina Elena National Cancer Institute, Rome, Italy; [isabella.sperduti@ifogov.it](mailto:isabella.sperduti@ifogov.it) (I.S.);

<sup>6</sup> Preclinical Models and New Therapeutic Agents Unit, IRCCS Regina Elena National Cancer Institute, Rome, Italy; [deluca\\_teresa@libero.it](mailto:deluca_teresa@libero.it) (T.D.L.); [donatella.delbufalo@ifogov.it](mailto:donatella.delbufalo@ifogov.it) (D.D.B.);

<sup>7</sup> Laboratory of Molecular Pharmacology, Department of Oncology, IRCCS - Istituto di Ricerche Farmacologiche "Mario Negri", Milan, Italy; [mirko.marabese@marionegri.it](mailto:mirko.marabese@marionegri.it) (M.M.);

<sup>8</sup> Central Research Institute for Advanced Molecular Medicine, Fukuoka University, Fukuoka, Japan;

[sshirasa@fukuoka-u.ac.jp](mailto:sshirasa@fukuoka-u.ac.jp) (S.S.);

<sup>9</sup> Institute of General Pathology, Catholic University of the Sacred Heart, Rome, Italy;

[demariaruggero@gmail.com](mailto:demariaruggero@gmail.com) (R.D.M.).

§ These authors contributed equally to this work.

### ***Supplementary file Summary***

- Supplementary Methods
- Supplementary Figure Legends
- Supplementary Table and Figures

1 ***Supplementary Methods***

2

3 **3-[4,5-diMethylThiazol- 2-yl]-2,5-diphenylTetrazolium bromide (MTT) Assay**

4 For MTT (Sigma- Aldrich, St. Louis, MO, USA) assay, tumor cells were dispensed into 96-well  
5 (Corning, Inc.) at variable concentration (1000 cells/well for A549 and 5000 cells/well for MiaPaCa2).  
6 The following day drugs were added at indicated concentrations. After 72 hours of treatment the MTT  
7 made up in medium to a final concentration of 0.5 mg/mL and incubate for 4 hours at 37°C.  
8 Subsequently the MTT was removed and 100 µl of Isopropanol was then added into each well to  
9 dissolve purple formazan crystals. After for 30 minutes of incubation the absorbance was measured at  
10 570 nm.

11 **Flow cytometric analysis of cell cycle**

12 The cell cycle analysis was performed on A549 and MiaPaCa2 cell lines treated with trametinib or  
13 dabrafenib alone or in combination for 48 hours. After treatment, the cells were trypsinized and fixed  
14 in cold 70% ethanol overnight. The cells were washed with PBS and then stained with Propidium  
15 Iodide (PI) solution (1 µg/µL PI and 0.125% RNaseA; Sigma Aldrich, St. Louis, MO) at room  
16 temperature. Approximately 10.000 cells/sample were analyzed using BD FACSCalibur flow  
17 cytometer.

18

19 ***Supplementary Figure Legends***

20

21 **Figure S1. RAF inhibition induces BRAF/CRAF heterodimerization in KRAS-mut contexts.**

22 HPAFII cells were treated with trametinib (10nM), dabrafenib (10µM) or RAF265 (10µM) for 4  
23 hours. Endogenous CRAF was immunoprecipitated and the immunocomplex was blotted for CRAF.  
24 In total cell lysates, BRAF and CRAF levels were shown.

25 **Figure S2. Effects of trametinib, dabrafenib and their combination on cell growth and cell cycle  
26 distribution in A549 and MiaPaCa2 cells.**

27 Cells were exposed to increasing concentration of  
28 trametinib (0.1-10 nM) and dabrafenib (0.1-10 µM) alone or in combination using a using a fixed-  
29 ratio 1:1000 and then assessed for cell viability (by MTT assay) and cell cycle distribution (by PI  
30 staining). **A and B.** CI were calculated by conservative isobologram analysis and plotted against the  
31 fraction affected. **C and D.** Histograms represent DNA contents of cell cycle phases G0/G1phase , S  
32 phase and G2/M phase. Results from one experiment representative of three are shown.

32 **Figure S3. Effects of trametinib and dabrafenib combination in lung cancer cells.** Lung cancer  
33 cells were treated with the combination of trametinib (0.01-10 nM) and dabrafenib (0.01-10 µM), at

34 fixed ratio (1:1000) for 72h and cell viability was assessed by Crystal violet assay. CI were calculated  
35 by conservative isobologram analysis for experimental data and plotted against the fraction affected.

36 **Figure S4. Effects of trametinib and dabrafenib combination in pancreatic cancer cells.**

37 Pancreatic cancer cells were treated with the combination of trametinib (0.01-10 nM) and dabrafenib  
38 (0.01-10  $\mu$ M), at fixed ratio of doses (1:1000) for 72h. CI were calculated by conservative  
39 isobologram analysis for experimental data and plotted against the fraction affected.

40 **Figure S5. Effects of trametinib, dabrafenib and their combination in LCSC.** LCSC1, LCSC4,

41 LCSC5 and LCSC6 cell lines were treated with trametinib and dabrafenib, alone or in combination,  
42 using a fixed dose ratio (1:1000). Cell viability was assessed by Crystal violet assay after 72 h. Results  
43 Are expressed as percentage of growth inhibition relative to untreated control and represent the  
44 average  $\pm$  SEM of three independent experiments. Pharmacologic interactions were evaluated using  
45 the Calcosyn software.

46 **Figure S6. Statistical correlation between *KRAS* status and pharmacological interactions.** Box

47 plot shows the relationships between trametinib/dabrafenib pharmacologic interactions (CI) and  
48 *KRAS* status in the panel of analyzed cell lines.

49 **Figure S7. Effects of lapatinib in *EGFR/HER2* amplified lung cancer cell lines.** Lung cancer cells

50 were treated with the combination of trametinib and lapatinib, alone or in combination (left panels)  
51 or dabrafenib and lapatinib, alone or in combination (right panels) 26 at fixed ratio of doses (1:1000  
52 and 27 1:1, respectively) for 72h. Pharmacologic interactions were evaluated using the Calcosyn  
53 software.

**Table S1. Summary of the genetic status of the cell lines analyzed and response to treatments.**

| Cell line                     | <i>KRAS</i>           | <i>BRAF</i> | CI tram/dabr        |
|-------------------------------|-----------------------|-------------|---------------------|
| <b>Lung</b>                   |                       |             |                     |
| A-427                         | G12D/wt*              | wt*         | 0.70                |
| A549                          | G12S/G12S*            | wt*         | 0.08                |
| Calu-1                        | G12C/wt*              | wt*         | 2.2x10 <sup>4</sup> |
| Calu-3                        | wt/wt*                | wt*         | 19.3                |
| HCC827                        | wt/wt                 | wt          | 0.66                |
| NCI-H460                      | Q61H/Q61H*            | wt*         | 0.80                |
| NCI-H1299                     | wt/wt*                | wt*         | 0.2                 |
| H1299 (K4)                    | wt [1]                | wt          | 0.13                |
| H1299 (D2)                    | G12D [1]              | wt          | 0.37                |
| H1299 (C2)                    | G12C [1]              | wt          | 0.39                |
| H1299 (V9)                    | G12V [1]              | wt          | 0.73                |
| <b>Lung Cancer Stem Cells</b> |                       |             |                     |
| LCSC1                         | wt                    | wt          | 0.02                |
| LCSC2                         | wt                    | wt          | 0.61                |
| LCSC3                         | wt                    | wt          | 0.43                |
| LCSC4                         | G12C                  | wt          | 316                 |
| LCSC5                         | wt                    | wt          | 3                   |
| <b>Pancreas</b>               |                       |             |                     |
| HPDE                          | wt                    | wt          | 0.83                |
| MiaPaCa2                      | G12C/G12C*            | wt*         | 0.17                |
| T3M4                          | wt/wt [2]             | wt          | 0.50                |
| PANC1                         | G12D <sup>†</sup>     | wt          | 3.90                |
| PACA44                        | G12V [2]              | wt          | 0.81                |
| HPAFII                        | G12D/wt <sup>†</sup>  | wt          | 0.32                |
| PT45P1                        | G13D <sup>†</sup>     | wt          | 0.60                |
| L3.6pl                        | G12D [3]              | wt          | 0.40                |
| <b>Organoids</b>              |                       |             |                     |
| N1                            | wt/wt <sup>§</sup>    | wt          | >1x10 <sup>20</sup> |
| T1                            | G12V/wt <sup>§</sup>  | wt          | 1x10 <sup>-3</sup>  |
| T5                            | G12R/ wt <sup>§</sup> | n.a.        | >1x10 <sup>10</sup> |
| T9                            | G12V/wt <sup>§</sup>  | wt          | 1x10 <sup>-4</sup>  |
| T14                           | G12D/wt <sup>§</sup>  | wt          | 0.06                |
| <b>Colon</b>                  |                       |             |                     |
| HCT116                        | G13D/wt* [4]          | wt*         | 1.1                 |
| HK2-6                         | G13D [4]              | wt          | 11.1                |
| HKE-3                         | wt [4]                | wt          | 3.6                 |

\**BRAF* and *KRAS* gene status was assessed by Sanger sequencing (see Supplementary M&M and Milella M. Sci Rep. 2017).

§ *BRAF* and *KRAS* gene status was assessed by Sanger sequencing (<https://www.ncbi.nlm.nih.gov/pmc/articles/PMC4334572/#SD15>)

† COSMIC website <http://www.sanger.ac.uk/cosmic/>

1. Garassino MC, Marabese M, Rusconi P, Rulli E, Martelli O, Farina G, Scanni A, Broggin M: **Different types of K-Ras mutations could affect drug sensitivity and tumour behaviour in non-small-cell lung cancer.** *Ann Oncol* 2011, **22**:235-237.
2. Moore PS, Sipos B, Orlandini S, Sorio C, Real FX, Lemoine NR, Gress T, Bassi C, Kloppel G, Kalthoff H, et al: **Genetic profile of 22 pancreatic carcinoma cell lines. Analysis of K-ras, p53, p16 and DPC4/Smad4.** *Virchows Arch* 2001, **439**:798-802.
3. Gysin S, Rickert P, Kastury K, McMahon M: **Analysis of genomic DNA alterations and mRNA expression patterns in a panel of human pancreatic cancer cell lines.** *Genes Chromosomes Cancer* 2005, **44**:37-51.
4. Shirasawa S, Furuse M, Yokoyama N, Sasazuki T: **Altered growth of human colon cancer cell lines disrupted at activated Ki-ras.** *Science* 1993, **260**:85-88.

**Figure S1**

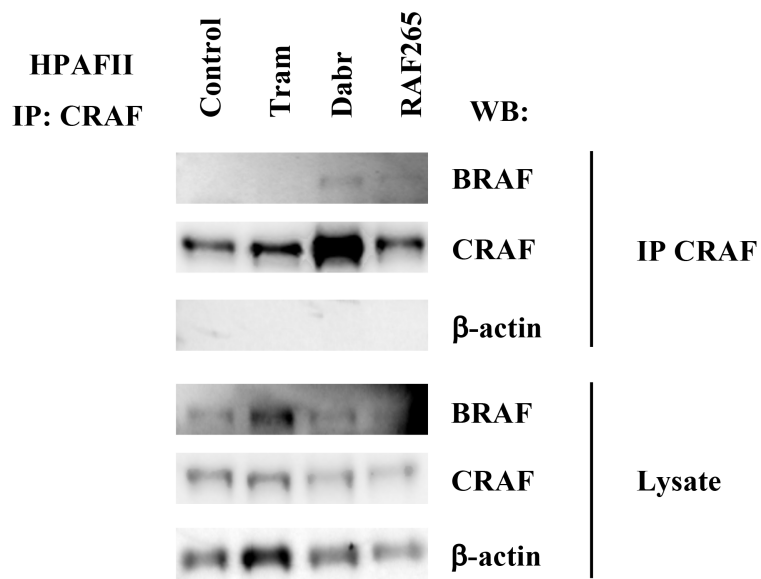

Figure S2

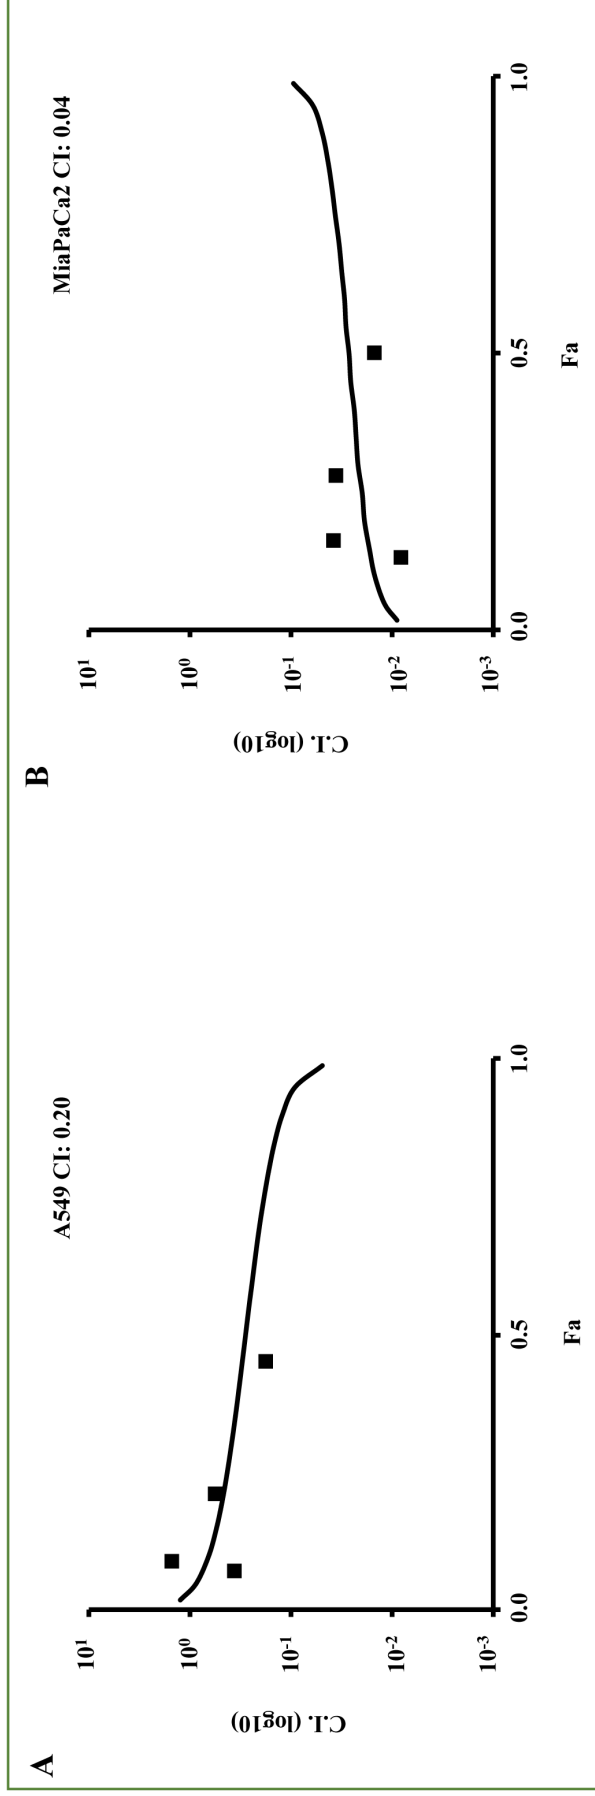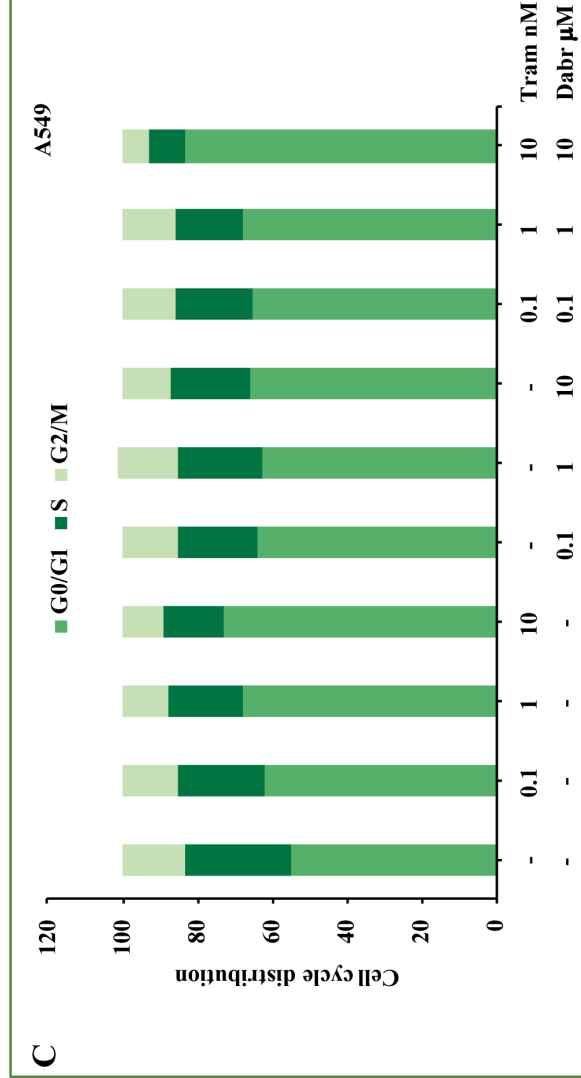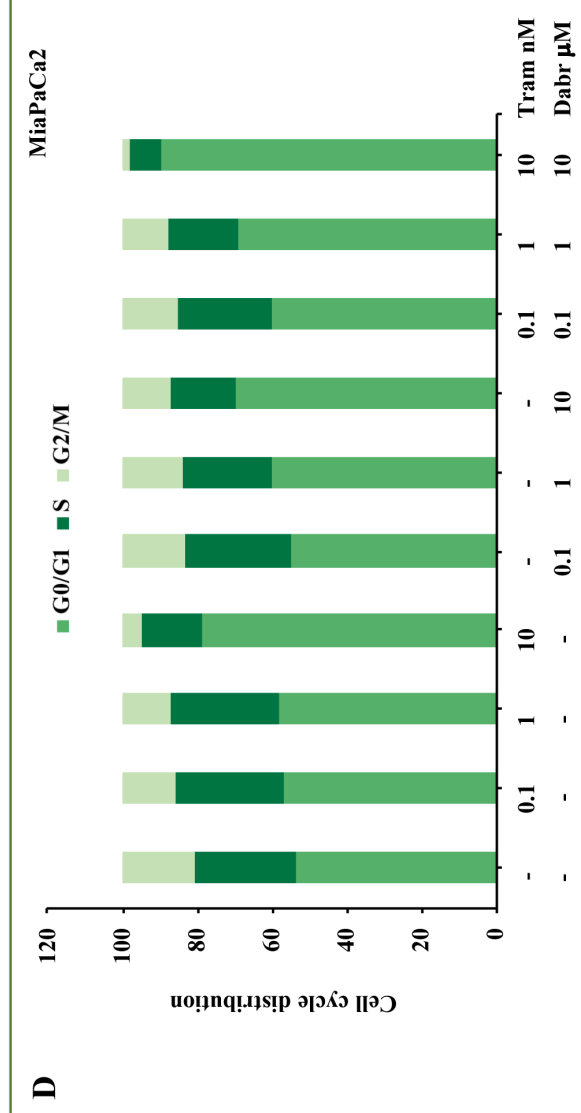



**Figure S3**

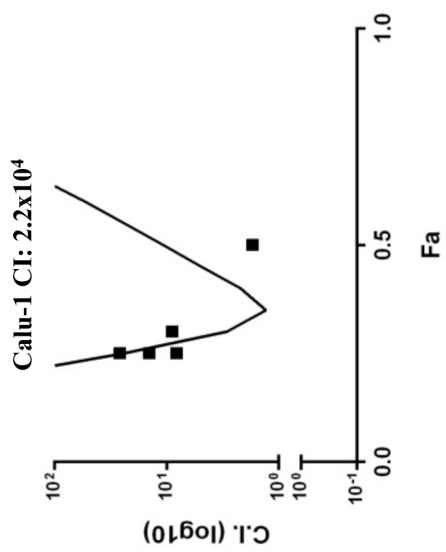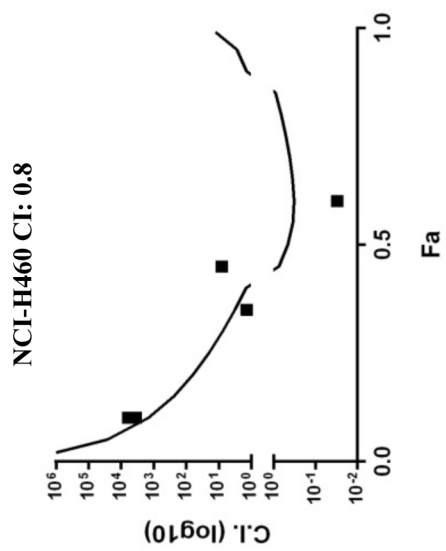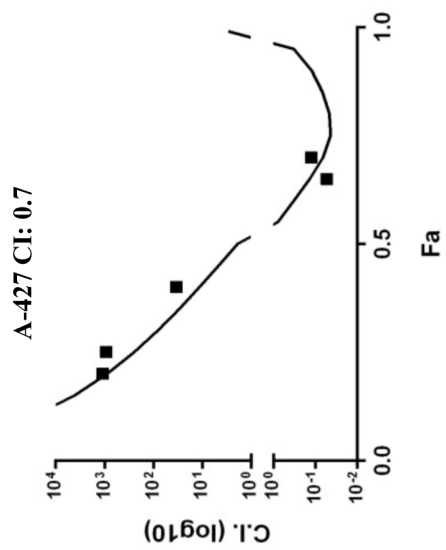

Figure S4

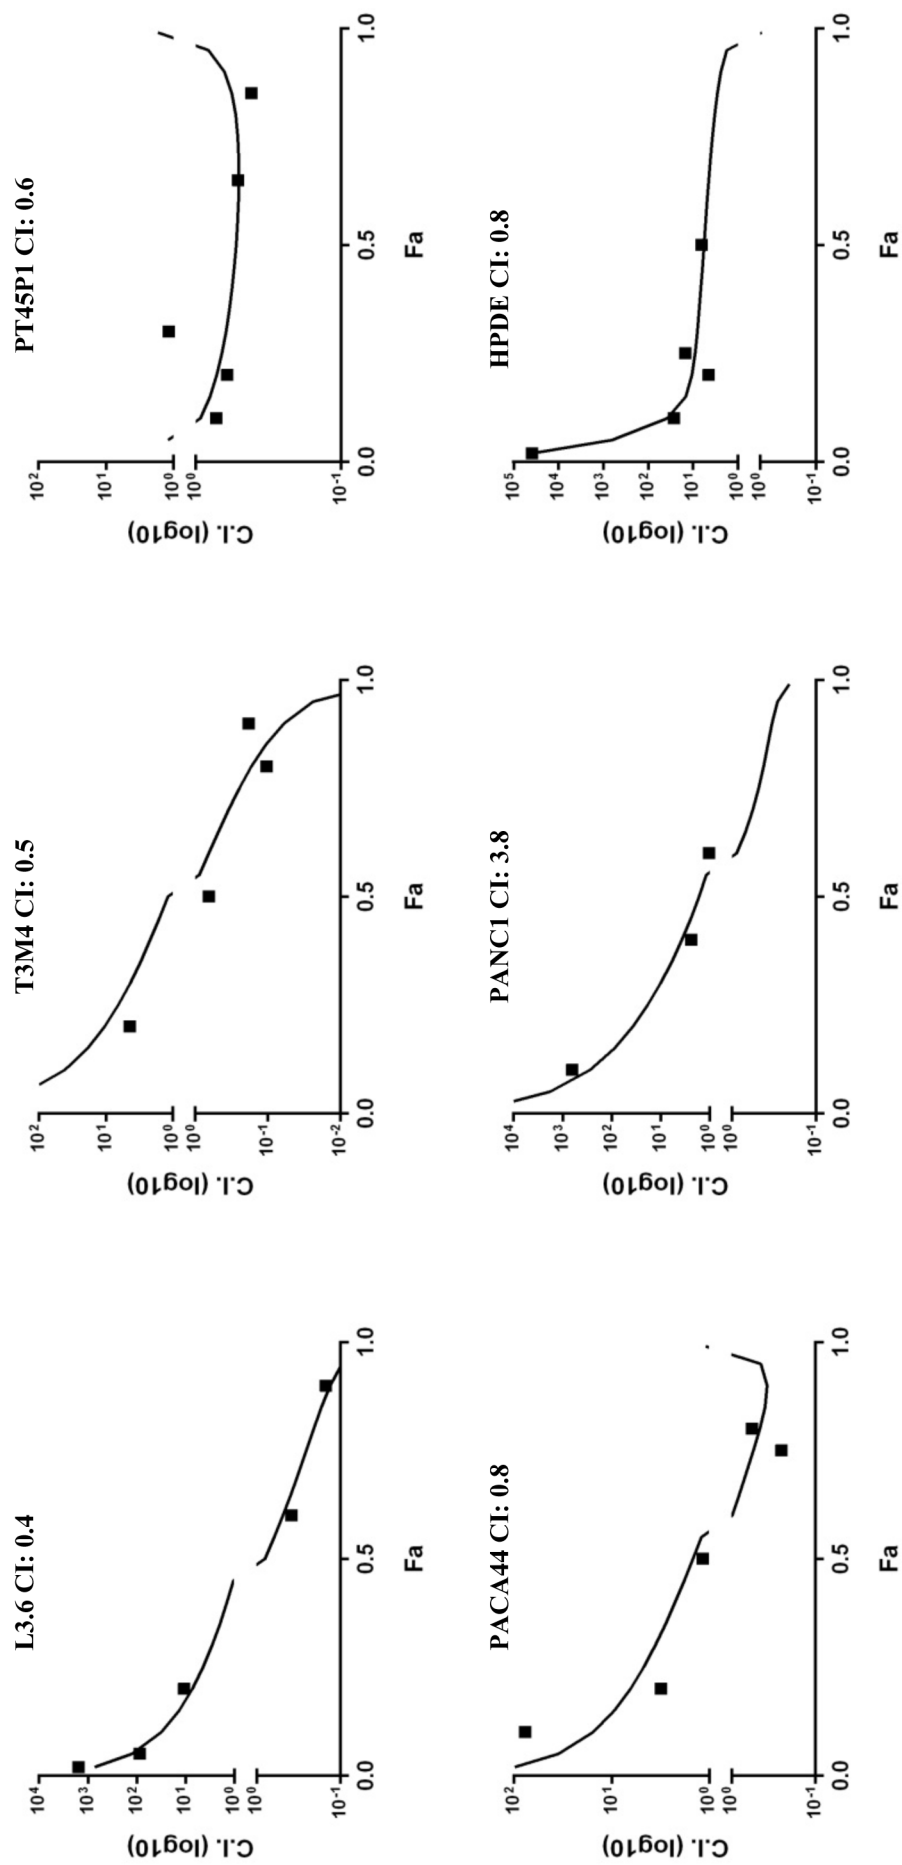

Figure S5

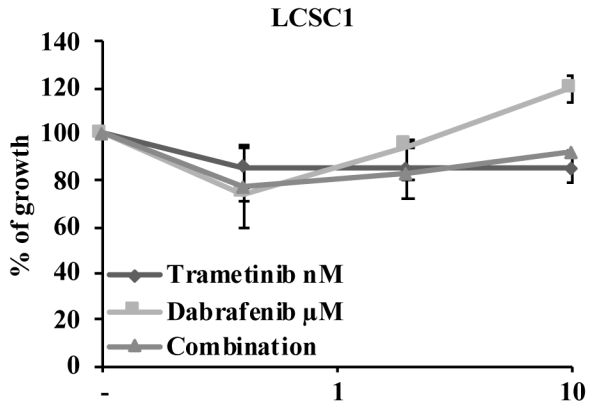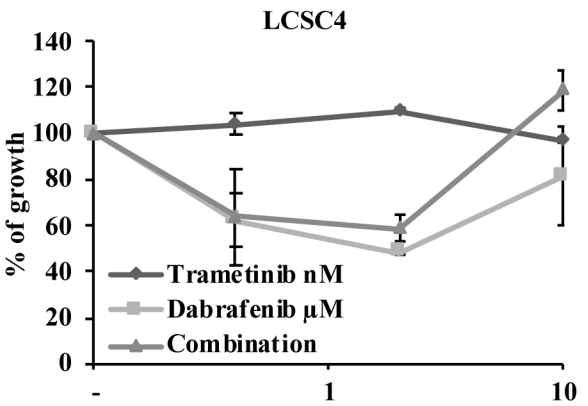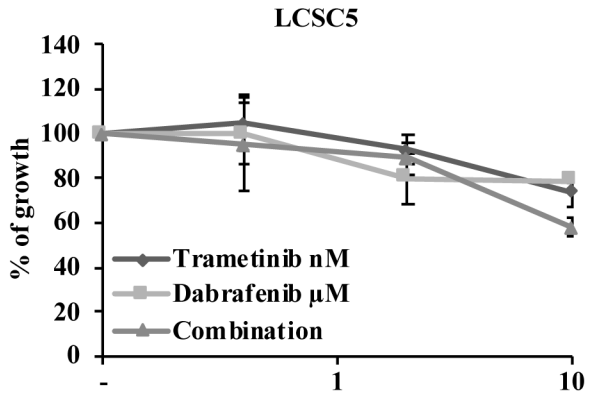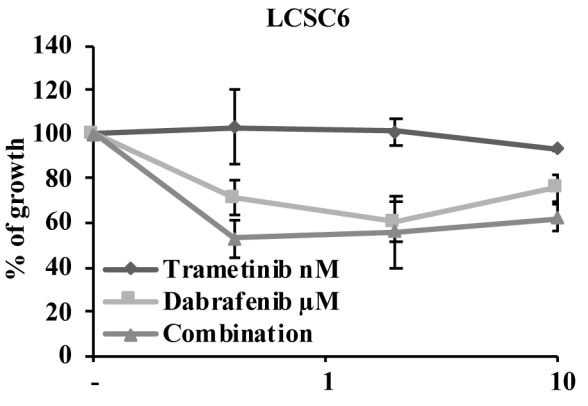

**Figure S6**

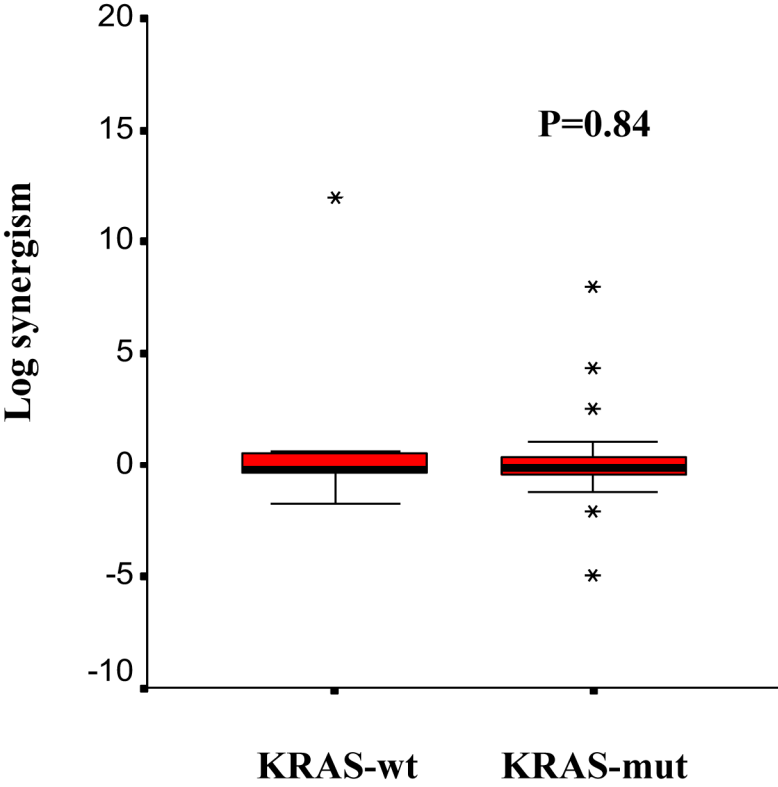

Figure S7

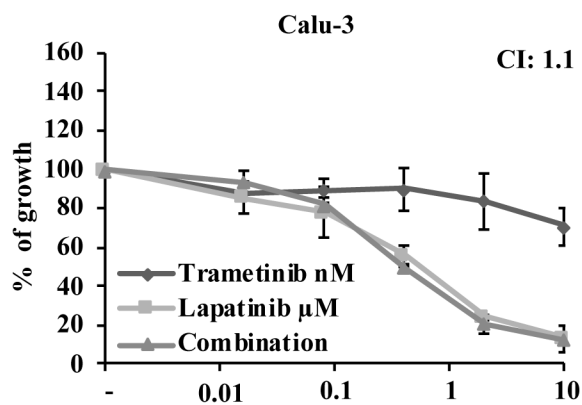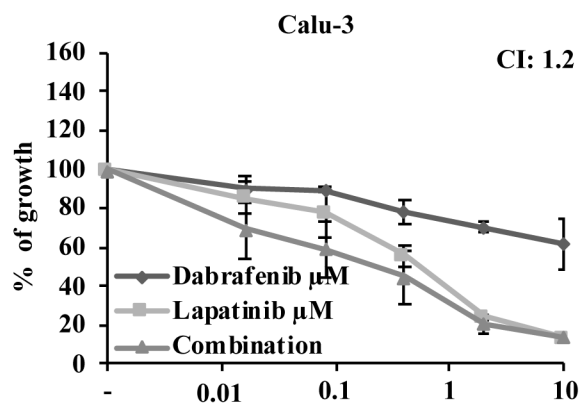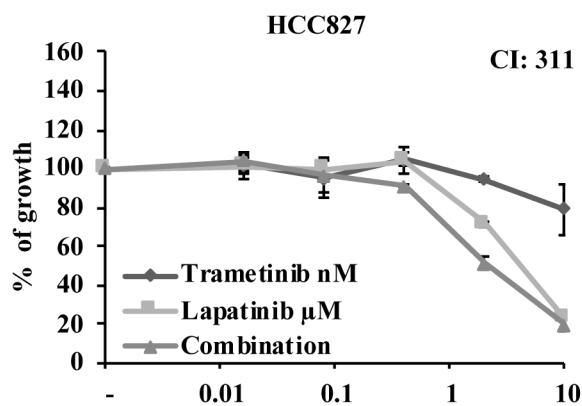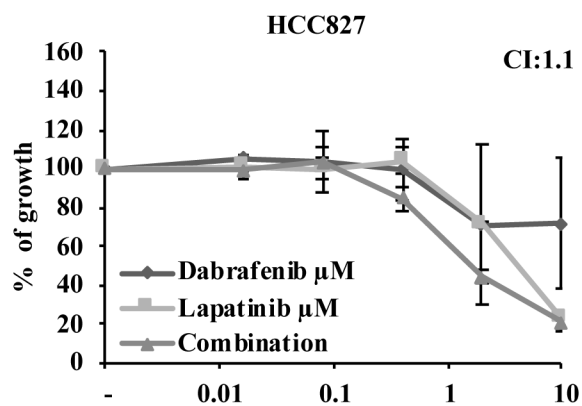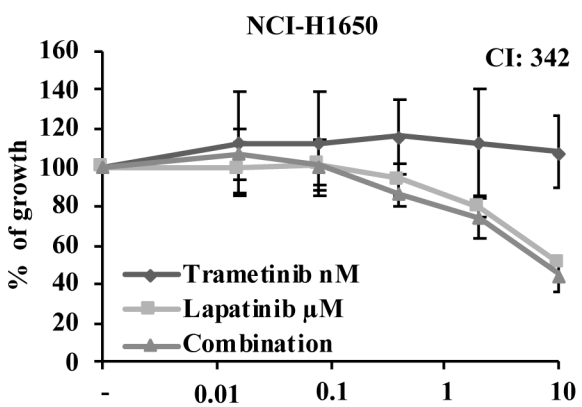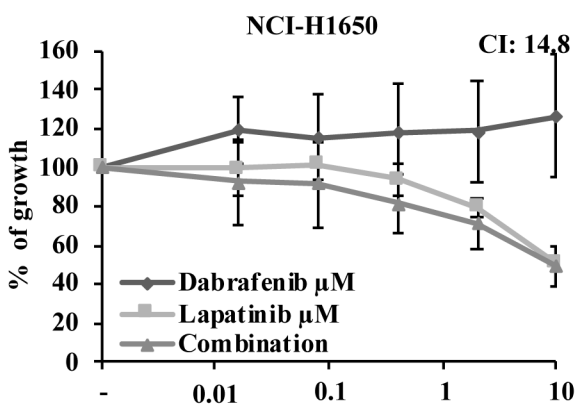

Supplement: MOESM1 [file 15927920]
